# Supplementary material for: Examination of Clock and Adcyap1 gene variation in a neotropical migratory passerine
Source: PLoS One. 2018 Jan 11;13(1):e0190859. doi: 10.1371/journal.pone.0190859 (PMC5764313; doi:10.1371/journal.pone.0190859)
Supplement: S4 Table — There is no indication that these two loci are in LD (p > 0.05). (XLSX) [file pone.0190859.s006.xlsx]

## Sheet: S4 Table
Population	Locus 1	Locus 2	P-Value	S.E.
Oklahoma	CLOCK	ADCYAP1	0.66	0.002
Louisiana	CLOCK	ADCYAP1	0.91	0.0009
North Carolina	CLOCK	ADCYAP1	0.91	0.0002
